# Supplementary material for: Effect ofGAS6andAXLGene Polymorphisms on Adiposity, Systemic Inflammation, and Insulin Resistance in Adolescents
Source: Hindawi journal article supplement (doi:10.1155/2014/674069), 2014-01-01
Supplement: f1 [file 674069.f1.pdf]

## Supplemental Data

Supplemental Table 1. Anthropometric and biochemical data among all adolescents with different *GAS6* rs8191973 genotypes

|                          | Genotypes   |             |            | GLM test <sup>a</sup> |       |       |
|--------------------------|-------------|-------------|------------|-----------------------|-------|-------|
|                          | GG          | GC          | CC         | p1                    | p2    | p3    |
| <b>Boys</b>              |             |             |            |                       |       |       |
| Numbers (%)              | 277 (77.4)  | 72 (20.1)   | 9 (2.5)    |                       |       |       |
| BMI (kg/m <sup>2</sup> ) | 22.4 ± 4.0  | 21.7 ± 4.0  | 24.2 ± 2.8 | 0.165                 | 0.483 | 0.318 |
| WC (cm)                  | 80.1 ± 10.5 | 79.2 ± 10.4 | 84.7 ± 8.6 | 0.325                 | 0.858 | 0.221 |
| hsCRP (mg/L)             | 0.8 ± 1.3   | 1.0 ± 1.3   | 1.0 ± 1.7  | 0.468                 | 0.218 | 0.495 |
| TNF-α (pg/mL)            | 26.8 ± 2.9  | 23.5 ± 4.1  | 25.3 ± 6.2 | 0.580                 | 0.317 | 0.448 |
| IL-6 (pg/mL)             | 3.2 ± 2.1   | 3.5 ± 3.1   | 3.9 ± 3.0  | 0.863                 | 0.648 | 0.894 |
| Glucose (mg/dL)          | 94.1 ± 6.4  | 92.7 ± 5.8  | 93.7 ± 4.1 | 0.218                 | 0.091 | 0.395 |
| Insulin (μU/mL)          | 15.4 ± 8.8  | 13.8 ± 8.3  | 17.1 ± 6.3 | 0.298                 | 0.250 | 0.511 |
| HOMA-IR                  | 3.6 ± 2.2   | 3.2 ± 2.1   | 4.0 ± 1.6  | 0.253                 | 0.197 | 0.438 |
| Gas6 (ng/mL)             | 12.1 ± 3.3  | 14.1 ± 3.7  | 12.9 ± 3.7 | 0.524                 | 0.310 | 0.785 |
| <b>Girls</b>             |             |             |            |                       |       |       |
| Numbers (%)              | 277 (75.1)  | 85 (23.0)   | 7 (1.9)    |                       |       |       |
| BMI (kg/m <sup>2</sup> ) | 21.1 ± 3.2  | 21.6 ± 3.7  | 21.1 ± 2.0 | 0.208                 | 0.098 | 0.843 |
| WC (cm)                  | 75.2 ± 7.8  | 76.5 ± 9.2  | 78.6 ± 6.8 | 0.262                 | 0.122 | 0.899 |
| hsCRP (mg/L)             | 0.6 ± 0.9   | 0.6 ± 0.7   | 0.3 ± 0.2  | 0.817                 | 0.706 | 0.689 |
| TNF-α (pg/mL)            | 22.7 ± 4.7  | 27.3 ± 5.4  | 25.1 ± 7.5 | 0.401                 | 0.183 | 0.917 |
| IL-6 (pg/mL)             | 3.3 ± 3.1   | 3.0 ± 1.4   | 2.8 ± 1.1  | 0.964                 | 0.790 | 0.913 |
| Glucose (mg/dL)          | 91.7 ± 6.4  | 91.1 ± 7.3  | 88.3 ± 3.5 | 0.401                 | 0.328 | 0.250 |
| Insulin (μU/mL)          | 14.1 ± 7.5  | 15.7 ± 8.0  | 15.9 ± 5.1 | 0.317                 | 0.129 | 0.671 |
| HOMA-IR                  | 3.2 ± 1.8   | 3.6 ± 1.9   | 3.4 ± 1.0  | 0.466                 | 0.217 | 0.828 |

|              |            |            |            |       |       |       |
|--------------|------------|------------|------------|-------|-------|-------|
| Gas6 (ng/mL) | 12.6 ± 3.9 | 12.2 ± 3.1 | 11.8 ± 3.1 | 0.446 | 0.289 | 0.684 |
|--------------|------------|------------|------------|-------|-------|-------|

Abbreviations: GLM, general linear model; BMI, body mass index; WC, waist circumference; HOMA-IR, homeostasis model assessment of insulin resistance; hsCRP, high-sensitivity C-reactive protein; TNF- $\alpha$ , tumor necrosis factor- $\alpha$ ; IL-6, interleukin-6.

<sup>a</sup>p1: GG vs. GC vs. CC; p2: GG vs. (GC+CC), p3: (GG+GC) vs. CC, after adjusting for age, Tanner stage, cigarette smoking, alcohol drinking, and physical activity.

Supplemental Table 2. Anthropometric and biochemical data among all adolescents with different GAS6 rs8191974 genotypes

|                          | Genotype    |             |            | GLM test <sup>a</sup> |              |       |
|--------------------------|-------------|-------------|------------|-----------------------|--------------|-------|
|                          | GG          | GA          | AA         | p1                    | p2           | p3    |
| <b>Boys</b>              |             |             |            |                       |              |       |
| Numbers (%)              | 213 (59.5)  | 132 (36.9)  | 13 (3.6)   |                       |              |       |
| BMI (kg/m <sup>2</sup> ) | 22.5 ± 4.2  | 22.0 ± 3.6  | 20.7 ± 3.3 | 0.131                 | <b>0.035</b> | 0.776 |
| WC (cm)                  | 80.6 ± 11.0 | 79.3 ± 9.5  | 76.7 ± 9.4 | 0.150                 | <b>0.037</b> | 0.950 |
| hsCRP (mg/L)             | 0.8 ± 1.2   | 1.1 ± 1.6   | 0.4 ± 0.2  | <b>0.033</b>          | <b>0.042</b> | 0.473 |
| TNF- $\alpha$ (pg/mL)    | 26.7 ± 8.2  | 25.5 ± 10.1 | 23.8 ± 4.6 | 0.951                 | 0.919        | 0.789 |
| IL-6 (pg/mL)             | 3.4 ± 2.8   | 3.3 ± 3.2   | 2.5 ± 1.3  | 0.635                 | 0.352        | 0.663 |
| Glucose (mg/dL)          | 94.0 ± 6.3  | 93.4 ± 6.4  | 95.3 ± 3.6 | 0.625                 | 0.928        | 0.361 |
| Insulin ( $\mu$ U/mL)    | 14.9 ± 8.7  | 15.3 ± 9.0  | 15.0 ± 8.2 | 0.187                 | 0.868        | 0.070 |
| HOMA-IR                  | 3.5 ± 2.2   | 3.6 ± 2.2   | 3.5 ± 2.0  | 0.169                 | 0.915        | 0.064 |
| Gas6 (ng/mL)             | 13.1 ± 3.7  | 13.2 ± 3.7  | 13.0 ± 3.1 | 0.183                 | 0.361        | 0.075 |

Girls

|                          |            |            |            |       |       |       |
|--------------------------|------------|------------|------------|-------|-------|-------|
| Numbers (%)              | 242 (65.6) | 109 (29.5) | 18 (4.9)   |       |       |       |
| BMI (kg/m <sup>2</sup> ) | 21.2 ± 3.3 | 21.3 ± 3.4 | 20.3 ± 2.3 | 0.759 | 0.585 | 0.520 |
| WC (cm)                  | 75.8 ± 8.1 | 75.2 ± 8.2 | 74.6 ± 8.3 | 0.590 | 0.335 | 0.954 |
| hsCRP (mg/L)             | 0.6 ± 1.0  | 0.5 ± 0.5  | 0.9 ± 1.3  | 0.241 | 0.631 | 0.161 |
| TNF- $\alpha$ (pg/mL)    | 24.5 ± 9.3 | 22.9 ± 6.5 | 27.9 ± 4.3 | 0.857 | 0.590 | 0.769 |
| IL-6 (pg/mL)             | 3.2 ± 2.8  | 3.1 ± 3.0  | 2.9 ± 0.7  | 0.364 | 0.156 | 0.606 |
| Glucose (mg/dL)          | 91.8 ± 6.7 | 90.6 ± 6.3 | 92.1 ± 5.7 | 0.820 | 0.643 | 0.786 |
| Insulin ( $\mu$ U/mL)    | 15.0 ± 8.1 | 13.9 ± 6.6 | 11.7 ± 4.2 | 0.088 | 0.078 | 0.137 |
| HOMA-IR                  | 3.4 ± 2.0  | 3.1 ± 1.5  | 2.7 ± 1.1  | 0.098 | 0.081 | 0.157 |
| Gas6 (ng/mL)             | 11.8 ± 3.1 | 12.1 ± 3.0 | 1.7 ± 2.2  | 0.333 | 0.355 | 0.406 |

Abbreviations: GLM, general linear model; BMI, body mass index; WC, waist circumference; HOMA-IR, homeostasis model assessment of insulin resistance; hsCRP, high-sensitivity C-reactive protein; TNF- $\alpha$ , tumor necrosis factor- $\alpha$ ; IL-6, interleukin-6.

*Bold* indicates significant comparisons ( $P < 0.05$ ).

<sup>a</sup>p1: GG vs. GA vs. AA; p2: GG vs. (GA+AA), p3: (GG+GA) vs. AA, after adjusting for age, Tanner stage, cigarette smoking, alcohol drinking, and physical activity.

|                          | Genotype    |             |             | GLM test <sup>a</sup> |       |       |
|--------------------------|-------------|-------------|-------------|-----------------------|-------|-------|
|                          | TT          | TC          | CC          | p1                    | p2    | p3    |
| <b>Boys</b>              |             |             |             |                       |       |       |
| Numbers (%)              | 123 (34.4)  | 170 (47.5)  | 65 (18.1)   |                       |       |       |
| BMI (kg/m <sup>2</sup> ) | 22.0 ± 3.7  | 22.6 ± 3.8  | 21.9 ± 4.7  | 0.467                 | 0.409 | 0.255 |
| WC (cm)                  | 79.4 ± 10.3 | 80.8 ± 10.0 | 79.0 ± 11.9 | 0.496                 | 0.473 | 0.260 |
| hsCRP (mg/L)             | 0.8 ± 1.2   | 1.0 ± 1.4   | 0.8 ± 1.3   | <b>0.036</b>          | 0.077 | 0.242 |
| TNF-α (pg/mL)            | 24.8 ± 5.5  | 26.2 ± 6.5  | 28.2 ± 10.1 | 0.587                 | 0.474 | 0.348 |
| IL-6 (pg/mL)             | 3.0 ± 2.8   | 3.4 ± 2.7   | 3.7 ± 3.5   | 0.679                 | 0.847 | 0.381 |
| Glucose (mg/dL)          | 93.4 ± 6.1  | 94.3 ± 6.0  | 93.4 ± 7.1  | 0.616                 | 0.546 | 0.591 |
| Insulin (μU/mL)          | 14.8 ± 8.1  | 15.6 ± 9.7  | 14.5 ± 7.9  | 0.393                 | 0.234 | 0.304 |
| HOMA-IR                  | 3.4 ± 2.0   | 3.7 ± 2.3   | 3.4 ± 2.0   | 0.388                 | 0.221 | 0.317 |
| <b>Girls</b>             |             |             |             |                       |       |       |
| Numbers (%)              | 108 (29.3)  | 181 (49.1)  | 80 (21.6)   |                       |       |       |
| BMI (kg/m <sup>2</sup> ) | 21.4 ± 3.6  | 21.1 ± 3.2  | 21.2 ± 3.0  | 0.621                 | 0.815 | 0.330 |
| WC (cm)                  | 75.8 ± 9.0  | 75.2 ± 7.7  | 76.1 ± 7.9  | 0.745                 | 0.550 | 0.788 |
| hsCRP (mg/L)             | 0.6 ± 0.8   | 0.6 ± 0.9   | 0.6 ± 0.9   | 0.933                 | 0.877 | 0.786 |
| TNF-α (pg/mL)            | 24.0 ± 7.3  | 25.7 ± 8.3  | 26.6 ± 8.3  | 0.859                 | 0.908 | 0.633 |
| IL-6 (pg/mL)             | 3.5 ± 3.0   | 2.9 ± 2.0   | 3.3 ± 2.9   | 0.152                 | 0.105 | 0.614 |
| Glucose (mg/dL)          | 92.0 ± 6.9  | 91.0 ± 6.5  | 91.8 ± 6.2  | 0.323                 | 0.919 | 0.163 |
| Insulin (μU/mL)          | 15.2 ± 7.3  | 14.1 ± 7.8  | 14.7 ± 7.4  | 0.693                 | 0.995 | 0.415 |
| HOMA-IR                  | 3.5 ± 1.7   | 3.2 ± 1.9   | 3.3 ± 1.7   | 0.620                 | 0.973 | 0.359 |

Abbreviations: GLM, general linear model; BMI, body mass index; WC, waist circumference; HOMA-IR, homeostasis model assessment of insulin resistance; hsCRP, high-sensitivity C-reactive protein; TNF-α, tumor necrosis factor-α; IL-6, interleukin-6.

*Bold* indicates significant comparisons ( $P < 0.05$ ).

<sup>a</sup>p1: TT vs. TC vs. CC; p2: TT vs. (TC+CC); p3: (TT+TC) vs. CC, after adjusting for age, Tanner stage, cigarette smoking, alcohol drinking, and physical activity.

Supplemental Table 4. Anthropometric and biochemical data among all adolescents with different *AXL* rs2304232 genotypes

|                          | Genotype    |             |             | GLM test <sup>a</sup> |       |              |
|--------------------------|-------------|-------------|-------------|-----------------------|-------|--------------|
|                          | AA          | AG          | GG          | p1                    | p2    | p3           |
| <b>Boys</b>              |             |             |             |                       |       |              |
| Numbers (%)              | 180 (50.2)  | 143 (40.0)  | 35 (9.8)    |                       |       |              |
| BMI (kg/m <sup>2</sup> ) | 22.3 ± 3.7  | 22.2 ± 3.9  | 22.4 ± 5.4  | 0.176                 | 0.183 | 0.101        |
| WC (cm)                  | 79.8 ± 10.1 | 80.3 ± 10.0 | 79.5 ± 13.8 | 0.267                 | 0.150 | 0.252        |
| hsCRP (mg/L)             | 0.9 ± 1.5   | 0.8 ± 1.0   | 0.8 ± 1.5   | 0.558                 | 0.628 | 0.286        |
| TNF-α (pg/mL)            | 26.9 ± 6.0  | 25.2 ± 7.0  | 24.7 ± 7.7  | 0.739                 | 0.440 | 0.891        |
| IL-6 (pg/mL)             | 3.1 ± 3.0   | 3.2 ± 3.1   | 4.8 ± 4.0   | 0.078                 | 0.938 | <b>0.033</b> |
| Glucose (mg/dL)          | 93.7 ± 5.8  | 94.0 ± 6.2  | 93.4 ± 8.4  | 0.642                 | 0.870 | 0.350        |
| Insulin (μU/mL)          | 15.4 ± 9.3  | 14.5 ± 8.2  | 15.9 ± 8.6  | 0.103                 | 0.425 | <b>0.033</b> |
| HOMA-IR                  | 3.6 ± 2.3   | 3.4 ± 2.0   | 3.7 ± 2.3   | 0.094                 | 0.445 | <b>0.030</b> |
| <b>Girls</b>             |             |             |             |                       |       |              |
| Numbers (%)              | 165 (44.7)  | 161 (43.6)  | 43 (11.7)   |                       |       |              |

|                          |            |            |            |       |       |       |
|--------------------------|------------|------------|------------|-------|-------|-------|
| BMI (kg/m <sup>2</sup> ) | 21.4 ± 3.5 | 21.0 ± 3.3 | 21.2 ± 2.5 | 0.893 | 0.649 | 0.791 |
| WC (cm)                  | 75.7 ± 8.6 | 75.5 ± 7.9 | 75.0 ± 7.3 | 0.640 | 0.626 | 0.525 |
| hsCRP (mg/L)             | 0.5 ± 0.8  | 0.5 ± 0.8  | 0.8 ± 1.4  | 0.545 | 0.818 | 0.271 |
| TNF- $\alpha$ (pg/mL)    | 24.7 ± 7.5 | 25.4 ± 8.4 | 28.1 ± 9.5 | 0.964 | 0.913 | 0.787 |
| IL-6 (pg/mL)             | 3.2 ± 3.1  | 3.0 ± 1.8  | 3.7 ± 3.5  | 0.629 | 0.413 | 0.472 |
| Glucose (mg/dL)          | 91.3 ± 6.5 | 91.5 ± 6.7 | 92.0 ± 6.0 | 0.271 | 0.197 | 0.194 |
| Insulin ( $\mu$ U/mL)    | 15.1 ± 7.5 | 14.0 ± 7.9 | 14.1 ± 6.1 | 0.740 | 0.854 | 0.503 |
| HOMA-IR                  | 3.4 ± 1.8  | 3.2 ± 1.9  | 3.2 ± 1.4  | 0.747 | 0.983 | 0.468 |

---

Abbreviations: GLM, general linear model; BMI, body mass index; WC, waist circumference; HOMA-IR, homeostasis model assessment of insulin resistance; hsCRP, high-sensitivity C-reactive protein; TNF- $\alpha$ , tumor necrosis factor- $\alpha$ ; IL-6, interleukin-6.

*Bold* indicates significant comparisons ( $P < 0.05$ ).

<sup>a</sup>p1: AA vs. AG vs. GG; p2: AA vs. (AG+GG); p3: (AA+AG) vs. GG, after adjusting for age, Tanner stage, cigarette smoking, alcohol drinking, and physical activity.

Supplemental Table 5. Logistic regression analyses of different *AXL* SNP on abnormal variables among adolescents.

| Variables <sup>b</sup> | <i>AXL</i> rs4802113        |                       | <i>AXL</i> rs2304232        |                       |
|------------------------|-----------------------------|-----------------------|-----------------------------|-----------------------|
|                        | TT OR (95% CI) <sup>a</sup> |                       | AA OR (95% CI) <sup>a</sup> |                       |
|                        | Unadjusted                  | Adjusted <sup>c</sup> | Unadjusted                  | Adjusted <sup>c</sup> |
| Boys                   |                             |                       |                             |                       |
| high BMI               | 0.91 (0.43–1.91)            | 0.57 (0.32–1.03)      | 0.81 (0.39–1.66)            | 0.66 (0.39–1.12)      |
| high WC                | 1.05 (0.50–2.19)            | 1.46 (0.58–3.70)      | 1.32 (0.68–2.58)            | 1.16(0.46–2.86)       |
| high hsCRP             | 0.52 (0.24–1.13)            | 0.59 (0.22–1.56)      | 1.42 (0.73–2.77)            | 1.30 (0.54–3.13)      |
| high TNF- $\alpha$     | 1.25 (0.55–2.83)            | 1.27 (0.43–3.85)      | 1.41 (0.66–3.01)            | 1.18 (0.40–3.45)      |
| high IL-6              | 0.74 (0.39–1.41)            | 0.32 (0.09–1.15)      | 0.99 (0.55–1.78)            | 0.93 (0.35–2.44)      |
| high HOMA-IR           | 0.78 (0.36–1.68)            | 0.67 (0.23–1.96)      | 0.76 (0.34–1.55)            | 0.75 (0.28–1.99)      |
| Girls                  |                             |                       |                             |                       |
| high BMI               | 0.57 (0.28–1.15)            | 0.83 (0.43–1.61)      | 1.35 (0.68–2.66)            | 1.20 (0.68–2.13)      |
| high WC                | 0.73 (0.37–1.43)            | 0.75 (0.29–1.96)      | 1.27 (0.65–2.48)            | 0.99 (0.43–2.33)      |
| high hsCRP             | 0.94 (0.45–1.97)            | 0.85 (0.34–2.13)      | 0.85 (0.43–1.66)            | 0.86 (0.38–1.96)      |
| high TNF- $\alpha$     | 1.03 (0.47–2.26)            | 1.94 (0.75–4.99)      | 1.05 (0.51–2.16)            | 1.16 (0.45–2.94)      |

|              |                  |                  |                  |                  |
|--------------|------------------|------------------|------------------|------------------|
| high IL-6    | 0.57 (0.26–1.29) | 0.51 (0.18–1.41) | 0.72 (0.36–1.41) | 0.57 (0.24–1.35) |
| high HOMA-IR | 1.23 (0.56–2.72) | 1.43 (0.57–3.57) | 1.26 (0.60–2.66) | 1.26 (0.52–3.03) |

---

<sup>a</sup>Under a recessive model (using heterozygotes and minor homozygotes as the reference for each SNP). <sup>b</sup>Abnormal variables were determined using an age- and gender-specific 90th percentile cut-off point.

<sup>c</sup>Adjusting for age, Tanner stage, cigarette smoking, alcohol drinking, and physical activity.

OR, odds ratio; CI, confidence index; BMI, body mass index; WC, waist circumference; HOMA-IR, homeostasis model assessment of insulin resistance; hsCRP, high-sensitivity C-reactive protein; TNF- $\alpha$ , tumor necrosis factor- $\alpha$ ; IL-6, interleukin-6.
